# Supplementary material for: TLR agonists induce sustained IgG to hemagglutinin stem and modulate T cells following newborn vaccination
Source: PubMed Central journal article supplement (PMC9424286; doi:10.1038/s41541-022-00523-8), 2022-08-29
Supplement: 41541_2022_523_MOESM1_ESM.pdf [file 41541_2022_523_MOESM1_ESM.pdf]

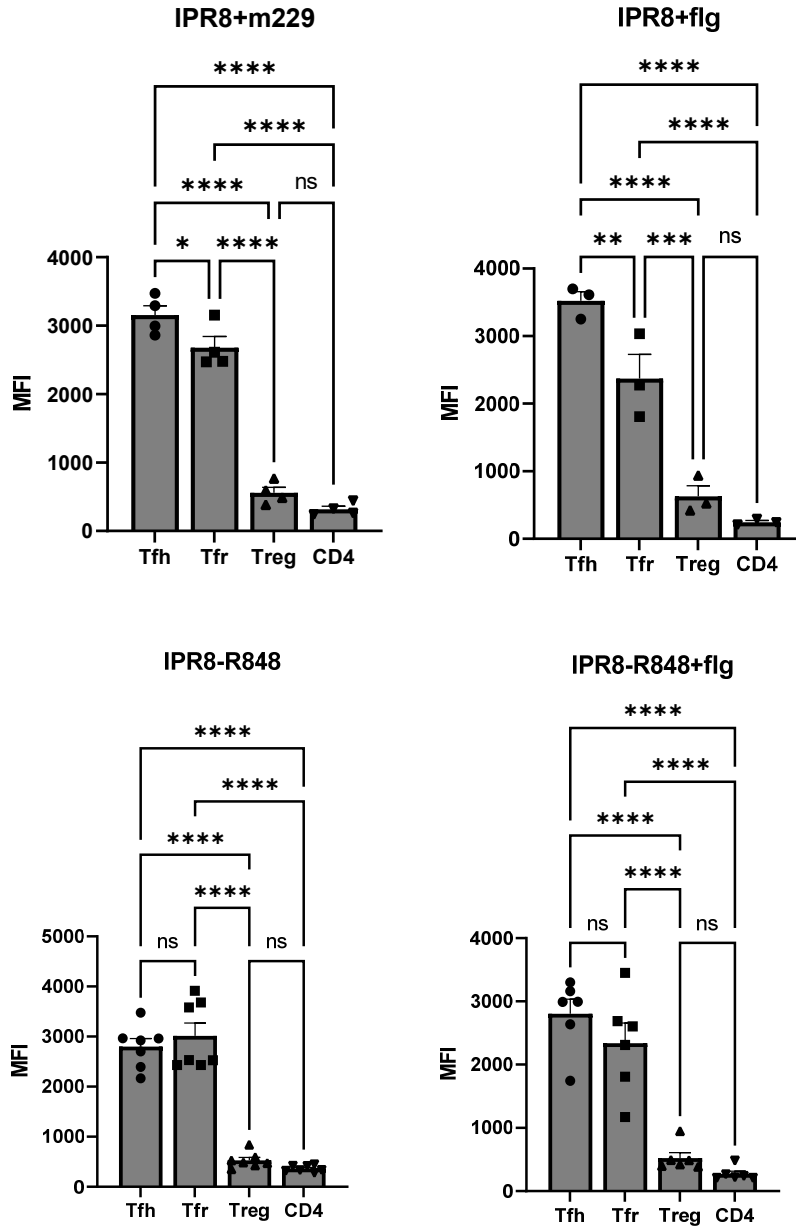

**Supplementary Figure 1. PD-1 expression on CD4 subsets.** PBMC collected from newborn NHP at d10 p.b were assessed for expression of PD-1 on Tfh, Tfr, Tregs, or CD4 cells that did not fall into these populations. Averages and SEM are indicated. Significance was determined by ANOVA. \* $p < 0.05$ , \*\* $p < 0.01$ , \*\*\* $p < 0.001$ , \*\*\*\* $p < 0.0001$

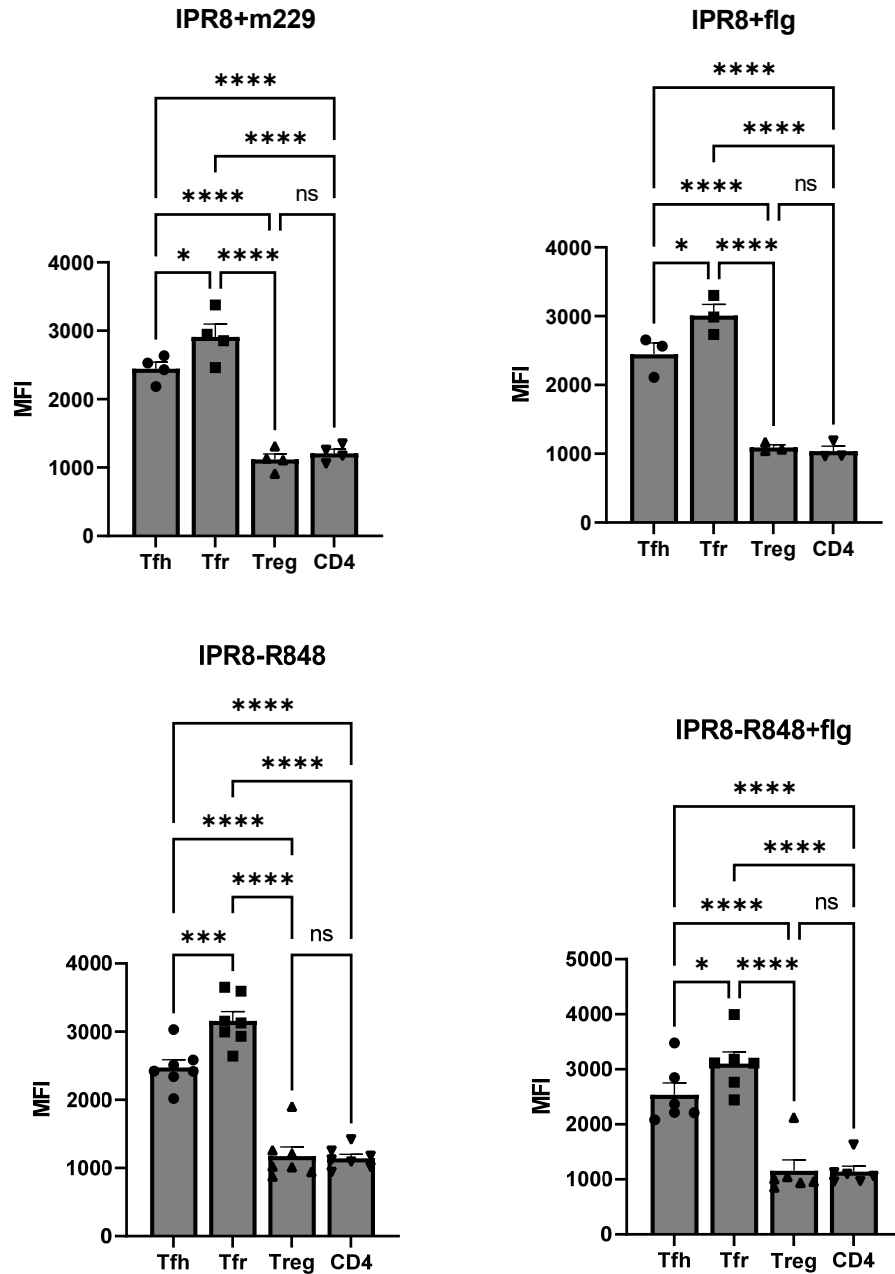

**Supplementary Figure 2. ICOS expression on CD4 subsets.** PBMC collected from newborn NHP at d10 p.b were assessed for expression of ICOS on T Tfh, Tfr, Tregs, or CD4 cells that did not fall into these populations. Averages and SEM are indicated. Significance was determined by ANOVA. \* $p < 0.05$ , \*\* $p < 0.01$ , \*\*\* $p < 0.001$ , \*\*\*\* $p < 0.0001$
