# Supplementary material for: TLR agonists induce sustained IgG to hemagglutinin stem and modulate T cells following newborn vaccination
Source: PubMed Central journal article supplement (PMC9424286; doi:10.1038/s41541-022-00523-8), 2022-08-29
Supplement: 41541_2022_523_MOESM2_ESM.pdf [file 41541_2022_523_MOESM2_ESM.pdf]

## Reporting Summary

Nature Portfolio wishes to improve the reproducibility of the work that we publish. This form provides structure for consistency and transparency in reporting. For further information on Nature Portfolio policies, see our [Editorial Policies](#) and the [Editorial Policy Checklist](#).

### Statistics

For all statistical analyses, confirm that the following items are present in the figure legend, table legend, main text, or Methods section.

n/a | Confirmed

- The exact sample size ( $n$ ) for each experimental group/condition, given as a discrete number and unit of measurement
- A statement on whether measurements were taken from distinct samples or whether the same sample was measured repeatedly
- The statistical test(s) used AND whether they are one- or two-sided  
*Only common tests should be described solely by name; describe more complex techniques in the Methods section.*
- A description of all covariates tested
- A description of any assumptions or corrections, such as tests of normality and adjustment for multiple comparisons
- A full description of the statistical parameters including central tendency (e.g. means) or other basic estimates (e.g. regression coefficient) AND variation (e.g. standard deviation) or associated estimates of uncertainty (e.g. confidence intervals)
- For null hypothesis testing, the test statistic (e.g.  $F$ ,  $t$ ,  $r$ ) with confidence intervals, effect sizes, degrees of freedom and  $P$  value noted  
*Give  $P$  values as exact values whenever suitable.*
- For Bayesian analysis, information on the choice of priors and Markov chain Monte Carlo settings
- For hierarchical and complex designs, identification of the appropriate level for tests and full reporting of outcomes
- Estimates of effect sizes (e.g. Cohen's  $d$ , Pearson's  $r$ ), indicating how they were calculated

*Our web collection on [statistics for biologists](#) contains articles on many of the points above.*

### Software and code

Policy information about [availability of computer code](#)

Data collection | Flow cytometric data were collected with CellQuest Pro version 6.0 or FACS Diva version 8.0.1, ELISA data were collected with Gen5 version 1.11.

Data analysis | FCAP Array software was used to analyze CBA data. FlowJo version 10 was used for other flow cytometric data. Graphpad Prism version 9 was used for statistical analyses

For manuscripts utilizing custom algorithms or software that are central to the research but not yet described in published literature, software must be made available to editors and reviewers. We strongly encourage code deposition in a community repository (e.g. GitHub). See the Nature Portfolio [guidelines for submitting code & software](#) for further information.

### Data

Policy information about [availability of data](#)

All manuscripts must include a [data availability statement](#). This statement should provide the following information, where applicable:

- Accession codes, unique identifiers, or web links for publicly available datasets
- A description of any restrictions on data availability
- For clinical datasets or third party data, please ensure that the statement adheres to our [policy](#)

*Provide your data availability statement here.*

## Human research participants

Policy information about [studies involving human research participants and Sex and Gender in Research](#).

### Reporting on sex and gender

Use the terms *sex* (biological attribute) and *gender* (shaped by social and cultural circumstances) carefully in order to avoid confusing both terms. Indicate if findings apply to only one sex or gender; describe whether sex and gender were considered in study design whether sex and/or gender was determined based on self-reporting or assigned and methods used. Provide in the source data disaggregated sex and gender data where this information has been collected, and consent has been obtained for sharing of individual-level data; provide overall numbers in this Reporting Summary. Please state if this information has not been collected. Report sex- and gender-based analyses where performed, justify reasons for lack of sex- and gender-based analysis.

### Population characteristics

Describe the covariate-relevant population characteristics of the human research participants (e.g. age, genotypic information, past and current diagnosis and treatment categories). If you filled out the behavioural & social sciences study design questions and have nothing to add here, write "See above."

### Recruitment

Describe how participants were recruited. Outline any potential self-selection bias or other biases that may be present and how these are likely to impact results.

### Ethics oversight

Identify the organization(s) that approved the study protocol.

Note that full information on the approval of the study protocol must also be provided in the manuscript.

## Field-specific reporting

Please select the one below that is the best fit for your research. If you are not sure, read the appropriate sections before making your selection.

Life sciences       Behavioural & social sciences       Ecological, evolutionary & environmental sciences

For a reference copy of the document with all sections, see [nature.com/documents/nr-reporting-summary-flat.pdf](https://www.nature.com/documents/nr-reporting-summary-flat.pdf)

## Life sciences study design

All studies must disclose on these points even when the disclosure is negative.

|                 |                                                                                                                                          |
|-----------------|------------------------------------------------------------------------------------------------------------------------------------------|
| Sample size     | Vaccination groups included 3-7 animals based on power calculations guided by previous results.                                          |
| Data exclusions | No data were excluded                                                                                                                    |
| Replication     | Replicates were in the form of individual animals. Each animal in the group served as a replicate. Groups contained 3-7 animals/vaccine. |
| Randomization   | Animals were randomly assigned to vaccine groups                                                                                         |
| Blinding        | Blinding was not possible, but objective parameters were used as primary read-outs.                                                      |

## Reporting for specific materials, systems and methods

We require information from authors about some types of materials, experimental systems and methods used in many studies. Here, indicate whether each material, system or method listed is relevant to your study. If you are not sure if a list item applies to your research, read the appropriate section before selecting a response.

### Materials & experimental systems

| n/a                                 | Involvement in the study                                        |
|-------------------------------------|-----------------------------------------------------------------|
| <input type="checkbox"/>            | <input checked="" type="checkbox"/> Antibodies                  |
| <input checked="" type="checkbox"/> | <input type="checkbox"/> Eukaryotic cell lines                  |
| <input checked="" type="checkbox"/> | <input type="checkbox"/> Palaeontology and archaeology          |
| <input type="checkbox"/>            | <input checked="" type="checkbox"/> Animals and other organisms |
| <input checked="" type="checkbox"/> | <input type="checkbox"/> Clinical data                          |
| <input checked="" type="checkbox"/> | <input type="checkbox"/> Dual use research of concern           |

### Methods

| n/a                                 | Involvement in the study                           |
|-------------------------------------|----------------------------------------------------|
| <input checked="" type="checkbox"/> | <input type="checkbox"/> ChIP-seq                  |
| <input type="checkbox"/>            | <input checked="" type="checkbox"/> Flow cytometry |
| <input checked="" type="checkbox"/> | <input type="checkbox"/> MRI-based neuroimaging    |

## Antibodies

|                 |                                                                                                                                                                                                                                                                                                                                                                                                                                  |
|-----------------|----------------------------------------------------------------------------------------------------------------------------------------------------------------------------------------------------------------------------------------------------------------------------------------------------------------------------------------------------------------------------------------------------------------------------------|
| Antibodies used | <p>Miltenyi<br/>CD3-PE Violet 770 (clone 10D12)</p> <p>BD<br/>CD4-PerCP-Cy5.5 (clone L200)<br/>CD20-AlexaFluor 700 (clone 2H7)<br/>HLA-DR FITC (clone L243)<br/>CD86-BV510 (clone 2331/(FUN-1))<br/>CD11c-PE (clone S-HCL-3)</p> <p>eBioscience<br/>CXCR5-PE (clone MU5UBEE)</p> <p>BioLegend<br/>PD-1-PE-Dazzle 594 (clone EH12.2H7)<br/>ICOS-BV510 (clone C398.4A)<br/>FoxP3-BV421 (206D)<br/>CD40-PerCP-Cy5.5 (clone 5C3)</p> |
| Validation      | These are validated by the manufacturer.                                                                                                                                                                                                                                                                                                                                                                                         |

## Animals and other research organisms

Policy information about [studies involving animals](#); [ARRIVE guidelines](#) recommended for reporting animal research, and [Sex and Gender in Research](#)

|                         |                                                                                                                                          |
|-------------------------|------------------------------------------------------------------------------------------------------------------------------------------|
| Laboratory animals      | African green monkey 3-5 days of age                                                                                                     |
| Wild animals            | The study did not involve wild animals                                                                                                   |
| Reporting on sex        | Infants were assigned to vaccine groups randomly as they were born.                                                                      |
| Field-collected samples | The study did not involve samples collected from the field.                                                                              |
| Ethics oversight        | The animal protocol was approved by the Wake Forest School of Medicine IACUC and adhered to the U.S. Animal Welfare Act and Regulations. |

Note that full information on the approval of the study protocol must also be provided in the manuscript.

## Flow Cytometry

### Plots

Confirm that:

- The axis labels state the marker and fluorochrome used (e.g. CD4-FITC).
- The axis scales are clearly visible. Include numbers along axes only for bottom left plot of group (a 'group' is an analysis of identical markers).
- All plots are contour plots with outliers or pseudocolor plots.
- A numerical value for number of cells or percentage (with statistics) is provided.

### Methodology

|                           |                                                                                                                                                                                                                           |
|---------------------------|---------------------------------------------------------------------------------------------------------------------------------------------------------------------------------------------------------------------------|
| Sample preparation        | Cell samples are from the designated tissue, prepared by making single cell suspension and stored in liquid nitrogen. Plasma is obtained via venipuncture and stored at -80C.                                             |
| Instrument                | Becton Dickinson FacsCalibur or Fortessa                                                                                                                                                                                  |
| Software                  | Flow cytometric data were collected with CellQuest Pro version 6.0 or FacsDiva version 8.0.1                                                                                                                              |
| Cell population abundance | Cell sorting was not used in the study.                                                                                                                                                                                   |
| Gating strategy           | Gating was performed by FSC/SSC gating followed by a viability dye to determine live cells. Subset markers were then used to identify populations of interest. Positivity was based on isotype control antibody staining. |

- Tick this box to confirm that a figure exemplifying the gating strategy is provided in the Supplementary Information.
